# Supplementary material for: (20S) Ginsenoside Rh2 Inhibits STAT3/VEGF Signaling by Targeting Annexin A2
Source: MDPI journal article supplement (doi:10.3390/ijms22179289), 2021-08-27
Supplement: s1 [file s1]

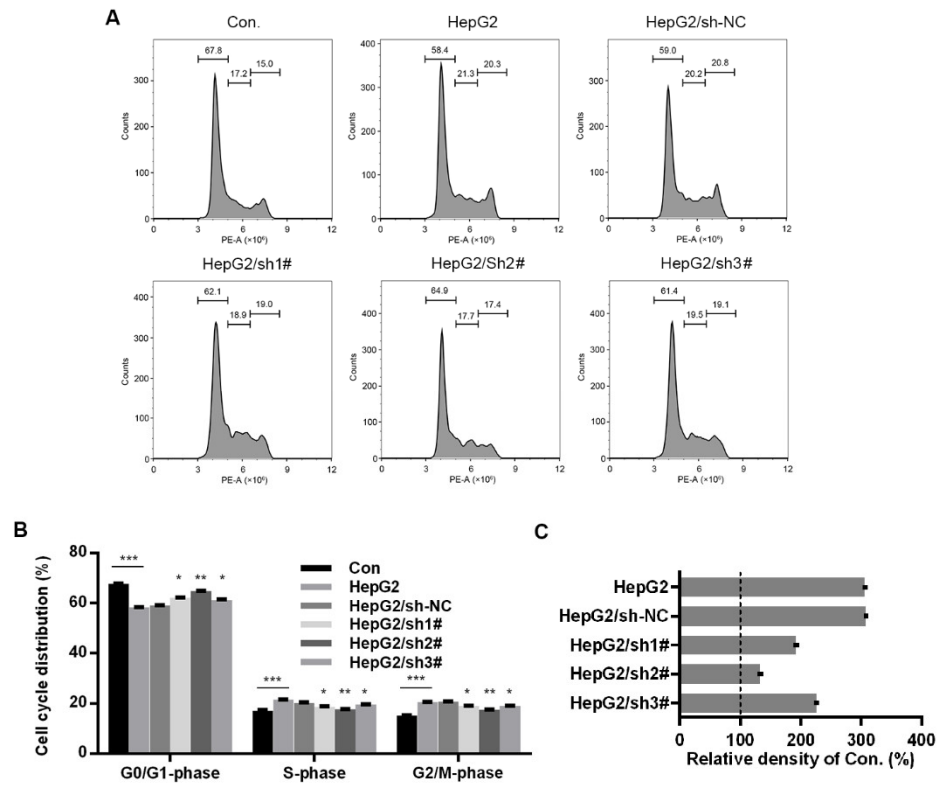

**Figure S1. (A, B)** The cell cycle of HUVECs co-cultured with HepG2 cells was determined by flow-cytometry. The fluorescence distribution **(A)** of HUVECs and cell cycle distribution **(B)** were shown as histogram. **(C)** Quantitative analysis of migrated HUVECs attached to Fig. 2F.

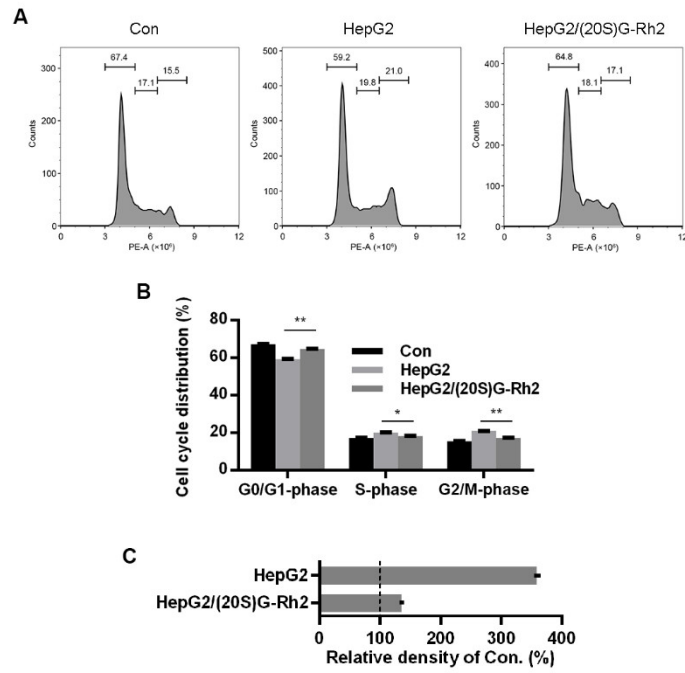

**Figure S2.** (A, B) The cell cycle of HUVECs co-cultured with (20S)G-Rh2 pre-treated HepG2 cells was determined by flow-cytometry. The florescence distribution (A) of HUVECs and cell cycle distribution (B) were shown as histogram. (C) Quantitative analysis of migrated HUVECs attached to Fig. 4F.

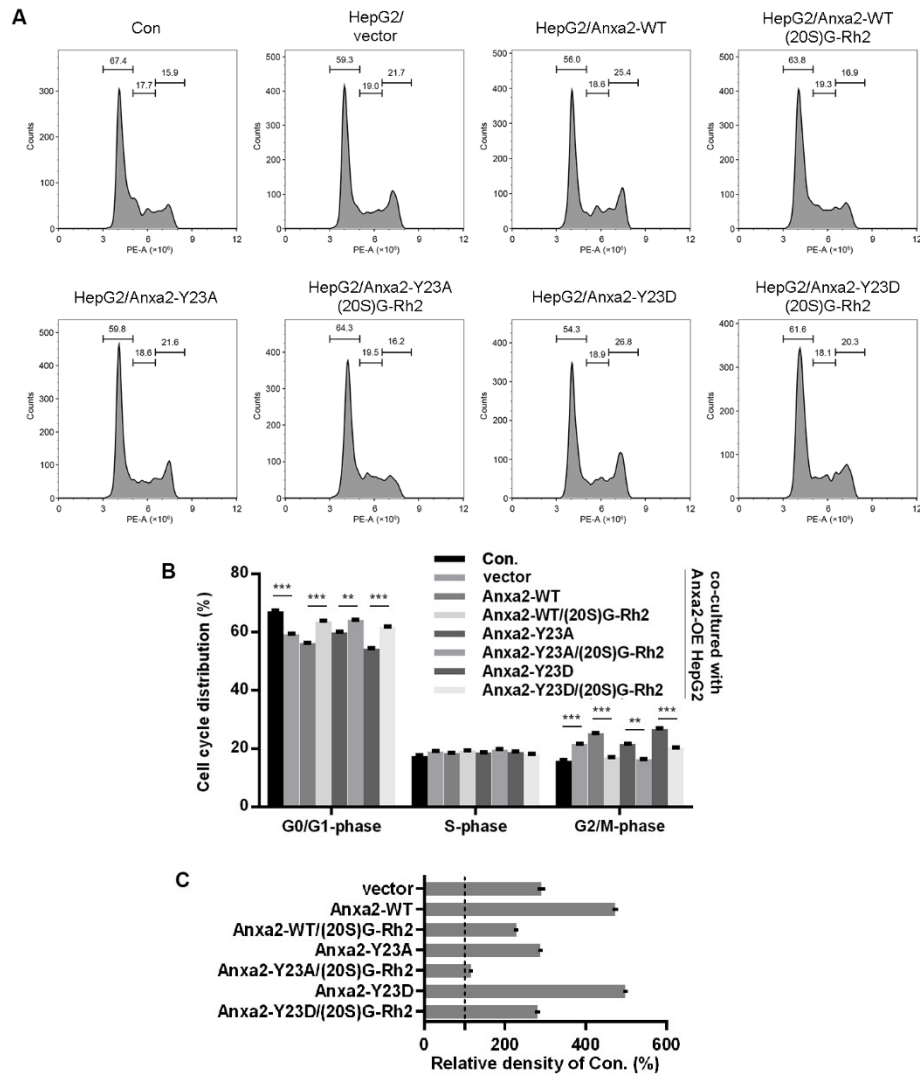

**Figure S3.** (20S)G-Rh2 inhibited Anxa2-Y23D mutant-enhanced proliferation and migration of HUVECs. **(A, B)** The cell cycle of HUVECs co-cultured with Anxa2-over-expressing HepG2 cells was determined by flow-cytometry. The florescence distribution **(A)** of HUVECs and cell cycle distribution **(B)** were shown as histogram. **(C)** Quantitative analysis of migrated HUVECs attached to Fig. 6F.

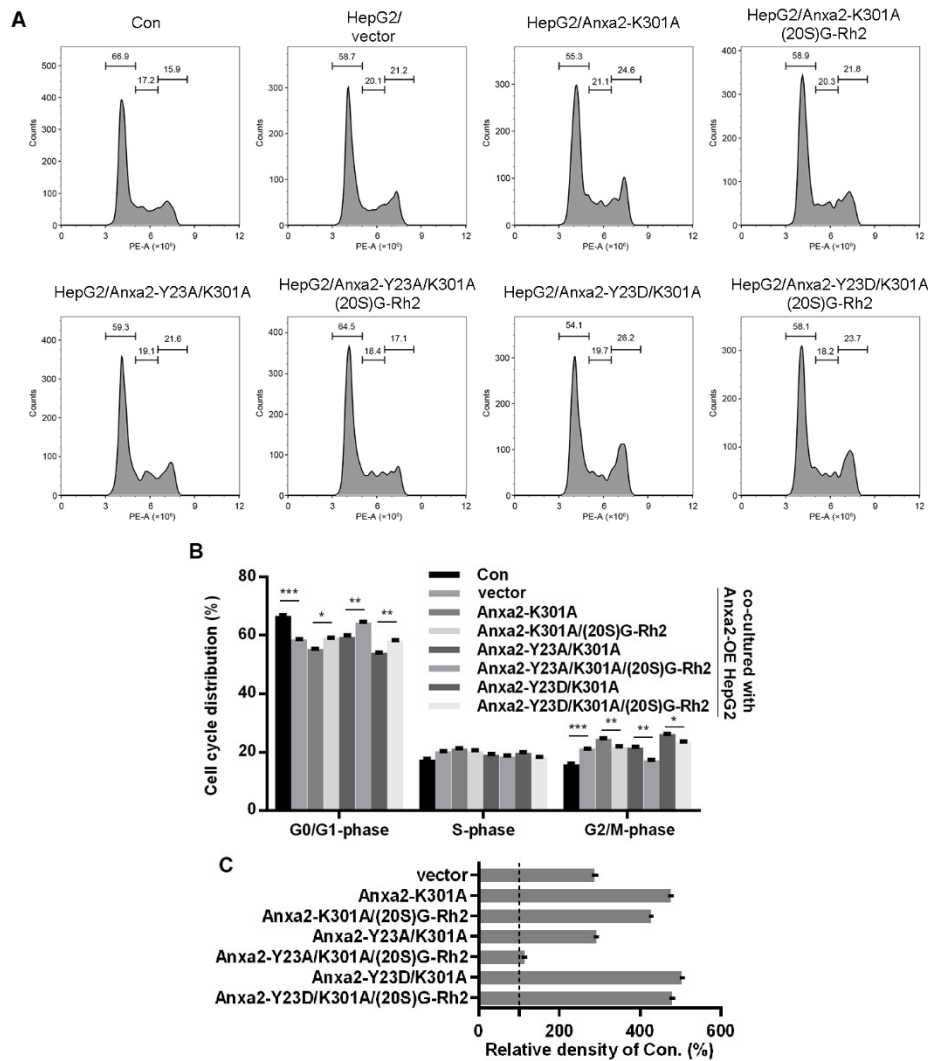

**Figure S4.** Anxa2-K301A mutant maintained pro-proliferation and pro-migration capability of HepG2 cells under (20S)G-Rh2 treatment. **(A, B)** The cell cycle of HUVECs co-cultured with Anxa2-over-expressing HepG2 cells was determined by flow-cytometry. The fluorescence distribution **(A)** of HUVECs and cell cycle distribution **(B)** were shown as histogram. **(C)** Quantitative analysis of migrated HUVECs attached to Fig. 8F.

**Table S1 Sequences of Anxa2 shRNA vectors**

| No.             |            | Sequences                                                               |
|-----------------|------------|-------------------------------------------------------------------------|
| 1#              | Target     | GATAGGTACAAGAGTTACAGC                                                   |
| Anxa2-Homo-741  | Sense      | CACCGATAGGTACAAGAGTTACAGCTTC<br>AAGAGAGCTGTAACCTCTTGACCTATCTT<br>TTTTG  |
|                 | Anit-sense | GATCCAAAAAAGATAGGTACAAGAGTTA<br>CAGCTCTCTTGAAGCTGTAACCTCTTGTA<br>CCTATC |
| 2#              | Target     | CTGAATTCAAGAGAAAGTACG                                                   |
| Anxa2-Homo-967  | Sense      | CACCGCTGAATTCAAGAGAAAGTACGTT<br>CAAGAGACGTACTTTCTCTTGAATTCAG<br>TTTTTTG |
|                 | Anit-sense | GATCCAAAAAACTGAATTCAAGAGAAAG<br>TACGTCTCTTGAACGTACTTTCTCTTGAA<br>TTCAGC |
| 3#              | Target     | CTTCCAGCTAACAGGTCTAGA                                                   |
| Anxa2-Homo-1116 | Sense      | CACCGCTTCCAGCTAACAGGTCTAGATT<br>CAAGAGATCTAGACCTGTTAGCTGGAAG<br>TTTTTTG |
|                 | Anit-sense | GATCCAAAAAACTTCCAGCTAACAGGTC<br>TAGATCTCTTGAATCTAGACCTGTTAGCT<br>GGAAGC |

**Table S2 Primer list of STAT3 target genes**

| Gene Name |   | Sequences                 |
|-----------|---|---------------------------|
| CDC25A    | F | TCTGGACAGCTCCTCTCGTCAT    |
|           | R | ACTTCCAGGTGGAGACTCCTCT    |
| CDC25C    | F | AGAAGCCCATCGTCCCTTTGGA    |
|           | R | GCAGGATACTGGTTCAGAGACC    |
| CDC37B    | F | GAGAGTGACTTCGACGTGTTCC    |
|           | R | TCCATTTGCACGCCACAGAGCT    |
| CCND1     | F | TCTACACCGACAACCTCCATCCG   |
|           | R | TCTGGCATT TTTGGAGAGGAAGTG |
| CCNG1     | F | CCTTCTGTGTTGGCATTGTCTATC  |
|           | R | CAAGCTCTTGCCAGAAGGTCAG    |
| CCNI      | F | CTTCACACAGCCACACCATTGG    |
|           | R | GTAGTTGCTTGGTAAGGACTGCC   |
| CCNJ1     | F | ACTGGACCTGTTTATGGACCGC    |
|           | R | TGCTCCAGCTTAGGCACACTGT    |
| CCNK1     | F | CACTATGATACCCTGGCAACTGG   |
|           | R | CAGAAAGAGGGCAACAGGCTCCT   |
| EGFR      | F | AACACCCTGGTCTGGAAGTACG    |
|           | R | TCGTTGGACAGCCTTCAAGACC    |
| VEGFA     | F | TTGCCTTGCTGCTCTACCTCCA    |
|           | R | GATGGCAGTAGCTGCGCTGATA    |
| VEGFB     | F | AAGGACAGTGCTGTGAAGCCAG    |
|           | R | TGGAGTGGGATGGGTGATGTCA    |
| VEGFC     | F | GCCAATCACACTTCCTGCCGAT    |
|           | R | AGGTCTTGTTGCTGCCTGACA     |
| VEGFD     | F | GACTGGAAGCTGTGGAGATGCA    |
|           | R | GGCTGCACTGAGTTCTTTGCCA    |
| PTEN      | F | TGAGTTCCCTCAGCCGTTACCT    |

|       |   |                        |
|-------|---|------------------------|
| GAPDH | R | GAGGTTTCCTCTGGTCCTGGTA |
|       | F | GTCTCCTCTGACTTCAACAGCG |
|       | R | ACCACCCTGTTGCTGTAGCCAA |

---
